# Supplementary material
Source: Springer Nature journal article supplement (https://www.springermedizin.de/resource/supplementary/12903_2013_355_MOESM3_ESM.docx/9516850)
Supplement: MOESM3 [file 9516850]

**Table 3 Caries prevalence and variables studied**

| Independent variable | Group（N） | DMFT>0 (n, %) | p-value |
| --- | --- | --- | --- |
| Gender | Boys (439) | 134, 31% | 0.013 |
|  | Girls (434) | 167, 39% |  |
|  |  |  |  |
| Location | Towns (424) | 154, 36% | 0.266 |
|  | Villages (449) | 147, 33% |  |
|  |  |  |  |
| Brushing twice or more daily | Yes (209) | 74, 35% | 0.674 |
|  | No (634) | 213, 34% |  |
|  |  |  |  |
| Eating snacks daily | Yes (459) | 160, 35% | 0.763 |
|  | No (378) | 128, 34% |  |
|  |  |  |  |
| Visiting dentist within last year | Yes (105) | 50, 48% | 0.002 |
|  | No (747) | 241, 32% |  |
|  |  |  |  |
